# Supplementary material for: Exosomal microRNA-92b Is a Diagnostic Biomarker in Breast Cancer and Targets Survival-Related MTSS1L to Promote Tumorigenesis
Source: MDPI journal article supplement (doi:10.3390/ijms25021295), 2024-01-20

## Supplementary Materials:

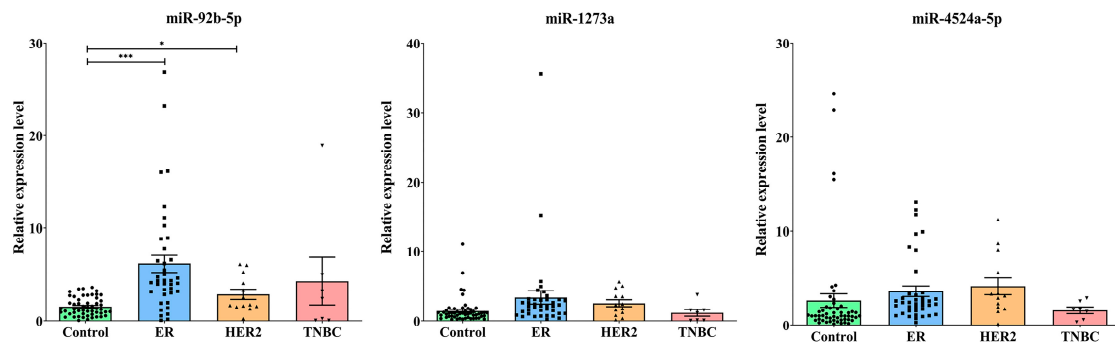

**Supplementary Figure S1.** Among the three candidate exosomal miRNAs, miR-92b-5p exhibit significant increase in ER and HER2 subtypes patients with breast cancer compared with that of controls. The  $p$ -value is estimated using a two-tailed t-test, and a  $p$  value of less than 0.05 (denoted as \*  $p < 0.05$ , and \*\*\*  $p < 0.001$ ) denotes statistical significance.

## Original Western Blot Figures

Thermo Scientific  
PageRuler Prestained Protein Ladder  
#26616  
**Fig 1A**

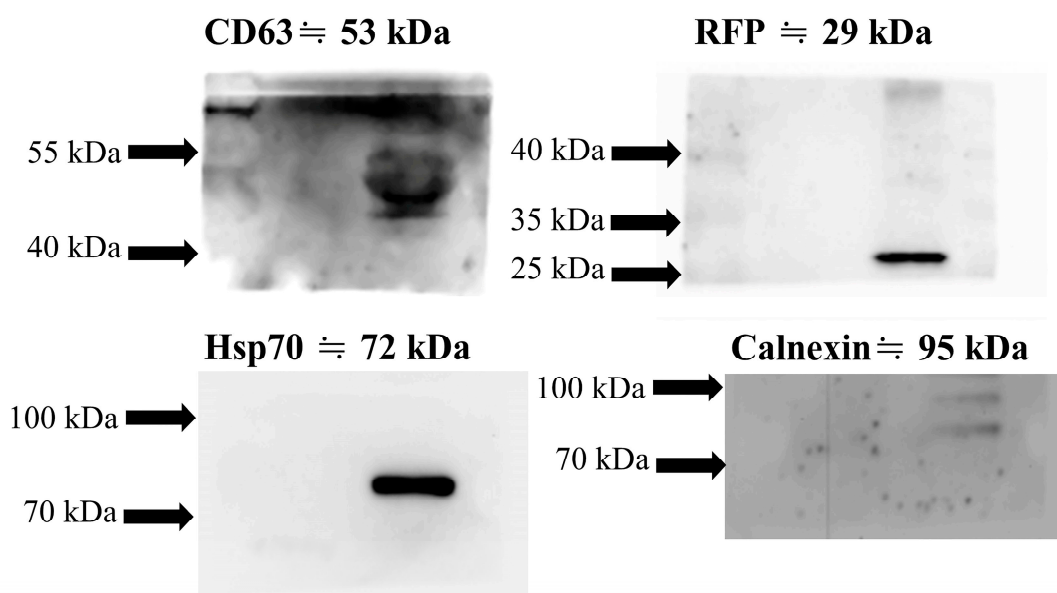

Thermo Scientific  
PageRuler Prestained Protein Ladder  
#26616

**Fig 2A**

**CD63  $\doteq$  53 kDa**

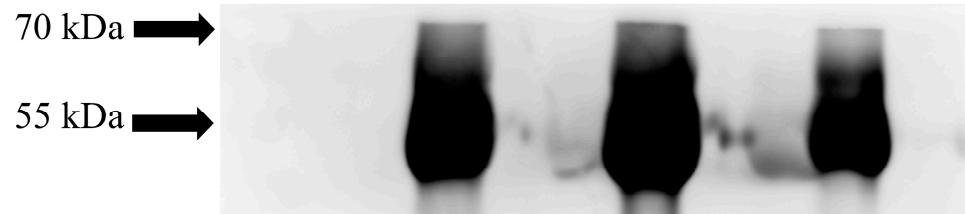

**GAPDH  $\doteq$  37 kDa**

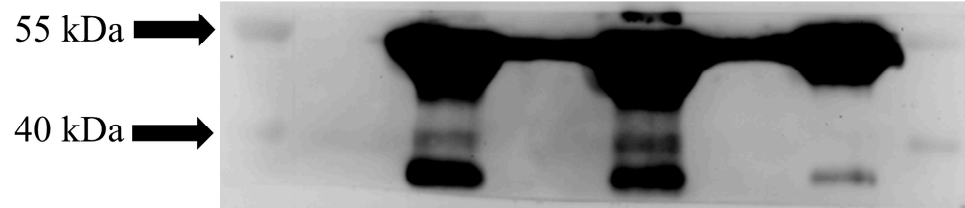

**Calnexin  $\doteq$  95 kDa**

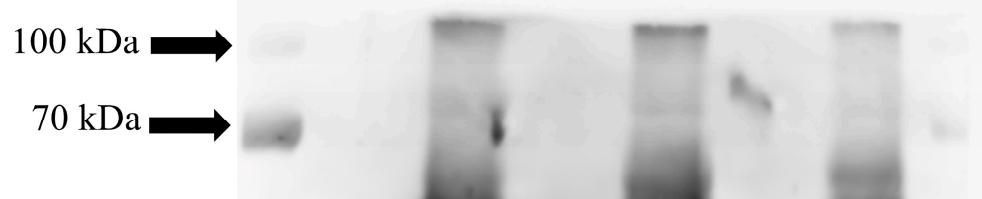

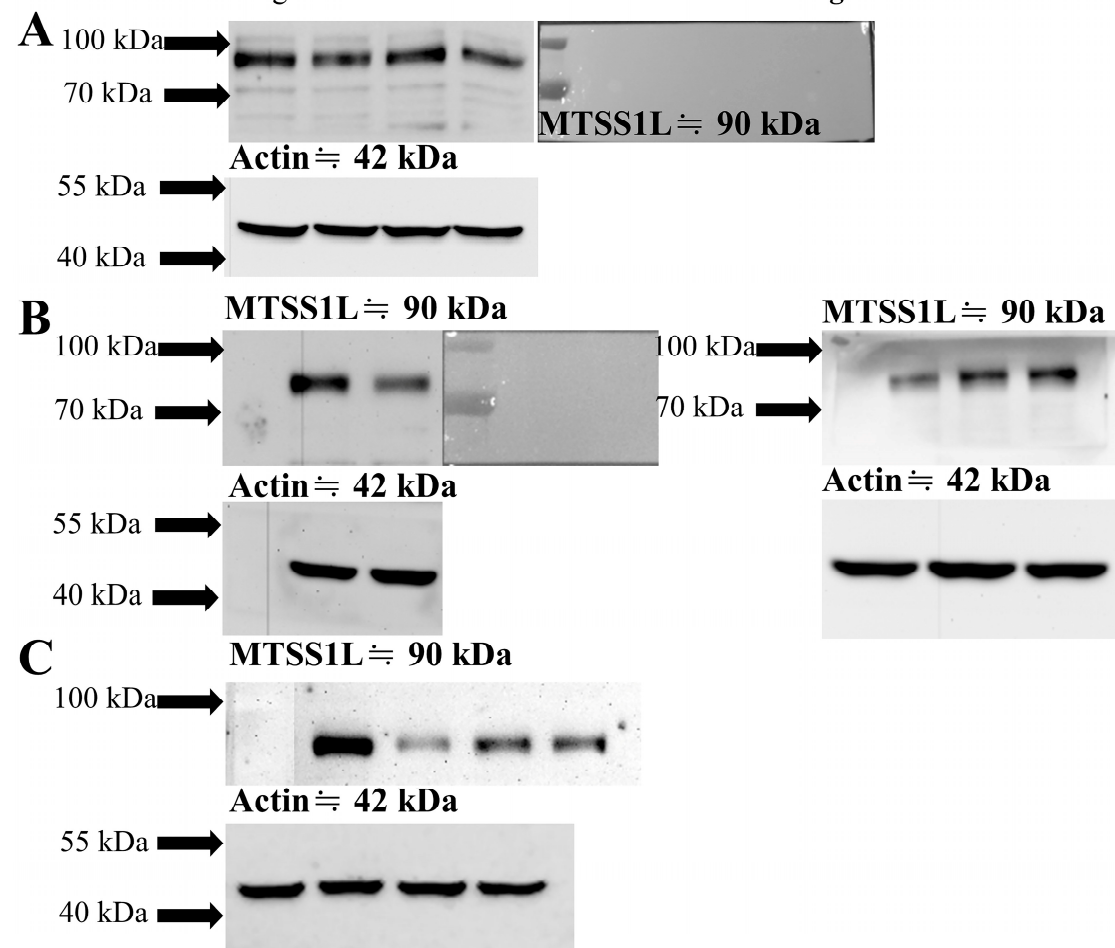

Supplement: s1 [file s1]
